# Supplementary material for: The Association Between Low Back Pain and Composition of IgG Glycome
Source: PubMed Central journal article supplement (PMC4882546; doi:10.1038/srep26815), 2016-05-27
Supplement: srep26815-s1.pdf [file srep26815-s1.pdf]

## THE ASSOCIATION BETWEEN LOW BACK PAIN AND COMPOSITION OF IgG GLYCOME

Maxim B. Freidin<sup>1,#</sup>, Toma Keser<sup>2,#</sup>, Ivan Gudelj<sup>3</sup>, Jerko Štambuk<sup>3</sup>, Dunja Vučenović<sup>1,4</sup>, Massimo Allegri<sup>5</sup>, Tamara Pavić<sup>2</sup>, Mirna Šimurina<sup>2</sup>, Stella

M. Fabiane<sup>1</sup>, Gordan Lauc<sup>2,3,\$\*</sup>, Frances M.K. Williams<sup>1,\$\*</sup>

**Supplementary table 1. Structure and description of the studied IgG glycans**

| GROUP                                 | Edinburgh Code | Zagreb Code | STRUCTURE <sup>a</sup>                                                               | DESCRIPTION                                       | FORMULA          |
|---------------------------------------|----------------|-------------|--------------------------------------------------------------------------------------|---------------------------------------------------|------------------|
| Total IgG glycans (neutral + charged) | IGP1           | GP1         | 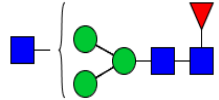   | The percentage of FA1 glycan in total IgG glycans | $GP1 / GP * 100$ |
|                                       | IGP2           | GP2         |    | The percentage of A2 glycan in total IgG glycans  | $GP2 / GP * 100$ |
|                                       | IGP3           | GP4         |   | The percentage of FA2 glycan in total IgG glycans | $GP4 / GP * 100$ |
|                                       | IGP4           | GP5         |  | The percentage of M5 glycan in total IgG glycans  | $GP5 / GP * 100$ |

|       |      |                                                                                      |                                                                |                   |
|-------|------|--------------------------------------------------------------------------------------|----------------------------------------------------------------|-------------------|
| IGP5  | GP6  | 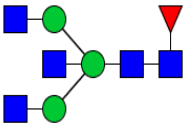   | <p>The percentage of FA2B glycan in total IgG glycans</p>      | $GP6 / GP^* 100$  |
| IGP6  | GP7  |    | <p>The percentage of A2G1 glycan in total IgG glycans</p>      | $GP7 / GP^* 100$  |
| IGP7  | GP8  |    | <p>The percentage of FA2[6]G1 glycan in total IgG glycans</p>  | $GP8 / GP^* 100$  |
| IGP8  | GP9  |    | <p>The percentage of FA2[3]G1 glycan in total IgG glycans</p>  | $GP9 / GP^* 100$  |
| IGP9  | GP10 |   | <p>The percentage of FA2[6]BG1 glycan in total IgG glycans</p> | $GP10 / GP^* 100$ |
| IGP10 | GP11 |  | <p>The percentage of FA2[3]BG1 glycan in total IgG glycans</p> | $GP11 / GP^* 100$ |
| IGP11 | GP12 |  | <p>The percentage of A2G2 glycan in total IgG glycans</p>      | $GP12 / GP^* 100$ |

|  |       |      |                                                                                      |                                                              |                   |
|--|-------|------|--------------------------------------------------------------------------------------|--------------------------------------------------------------|-------------------|
|  | IGP12 | GP13 | 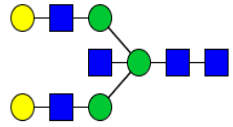   | <i>The percentage of A2BG2 glycan in total IgG glycans</i>   | $GP13 / GP * 100$ |
|  | IGP13 | GP14 |    | <i>The percentage of FA2G2 glycan in total IgG glycans</i>   | $GP14 / GP * 100$ |
|  | IGP14 | GP15 |    | <i>The percentage of FA2BG2 glycan in total IgG glycans</i>  | $GP15 / GP * 100$ |
|  | IGP15 | GP16 |    | <i>The percentage of FA2G1S1 glycan in total IgG glycans</i> | $GP16 / GP * 100$ |
|  | IGP16 | GP17 |   | <i>The percentage of A2G2S1 glycan in total IgG glycans</i>  | $GP17 / GP * 100$ |
|  | IGP17 | GP18 |  | <i>The percentage of FA2G2S1 glycan in total IgG glycans</i> | $GP18 / GP * 100$ |

|                                        |       |                 |  |                                                                                                                             |                                                                              |
|----------------------------------------|-------|-----------------|--|-----------------------------------------------------------------------------------------------------------------------------|------------------------------------------------------------------------------|
|                                        | IGP18 | GP19            |  | <i>The percentage of FA2BG2S1 glycan in total IgG glycans</i>                                                               | $GP19 / GP * 100$                                                            |
|                                        | IGP19 | GP20            |  | <i>Structure not determined</i>                                                                                             | $GP20 / GP * 100$                                                            |
|                                        | IGP20 | GP21            |  | <i>The percentage of A2G2S2 glycan in total IgG glycans</i>                                                                 | $GP21 / GP * 100$                                                            |
|                                        | IGP21 | GP22            |  | <i>The percentage of A2BG2S2 glycan in total IgG glycans</i>                                                                | $GP22 / GP * 100$                                                            |
|                                        | IGP22 | GP23            |  | <i>The percentage of FA2G2S2 glycan in total IgG glycans</i>                                                                | $GP23 / GP * 100$                                                            |
|                                        | IGP23 | GP24            |  | <i>The percentage of FA2BG2S2 glycan in total IgG glycans</i>                                                               | $GP24 / GP * 100$                                                            |
| Total IgG glycans - derived parameters | IGP24 | FGS/(FG+FGS)    |  | <i>The percentage of sialylation of fucosylated galactosylated structures without bisecting GlcNAc in total IgG glycans</i> | $SUM(GP16 + GP18 + GP23) / SUM(GP16 + GP18 + GP23 + GP8 + GP9 + GP14) * 100$ |
|                                        | IGP25 | FBGS/(FBG+FBGS) |  | <i>The percentage of sialylation of fucosylated galactosylated structures with bisecting GlcNAc</i>                         | $SUM(GP19 + GP24) / SUM(GP19 + GP24 +$                                       |

|       |                               |  |                                                                                                                                |                                                                                    |
|-------|-------------------------------|--|--------------------------------------------------------------------------------------------------------------------------------|------------------------------------------------------------------------------------|
|       |                               |  | <i>in total IgG glycans</i>                                                                                                    | $GP10 + GP11 + GP15)^* 100$                                                        |
| IGP26 | $FGS/(F+FG+FGS)$              |  | <i>The percentage of sialylation of all fucosylated structures without bisecting GlcNAc in total IgG glycans</i>               | $SUM(GP16 + GP18 + GP23) / SUM(GP16 + GP18 + GP23 + GP4 + GP8 + GP9 + GP14)^* 100$ |
| IGP27 | $FBGS/(FB+FBG+FBGS)$          |  | <i>The percentage of sialylation of all fucosylated structures with bisecting GlcNAc in total IgG glycans</i>                  | $SUM(GP19 + GP24) / SUM(GP19 + GP24 + GP6 + GP10 + GP11 + GP15)^* 100$             |
| IGP28 | $FG1S1/(FG1+FG1S1)$           |  | <i>The percentage of monosialylation of fucosylated monogalactosylated structures in total IgG glycans</i>                     | $GP16 / SUM(GP16 + GP8 + GP9)^* 100$                                               |
| IGP29 | $FG2S1/(FG2+FG2S1+FG2S2)$     |  | <i>The percentage of monosialylation of fucosylated digalactosylated structures in total IgG glycans</i>                       | $GP18 / SUM(GP18 + GP14 + GP23)^* 100$                                             |
| IGP30 | $FG2S2/(FG2+FG2S1+FG2S2)$     |  | <i>The percentage of disialylation of fucosylated digalactosylated structures in total IgG glycans</i>                         | $GP23 / SUM(GP23 + GP14 + GP18)^* 100$                                             |
| IGP31 | $FBG2S1/(FBG2+FBG2S1+FBG2S2)$ |  | <i>The percentage of monosialylation of fucosylated digalactosylated structures with bisecting GlcNAc in total IgG glycans</i> | $GP19 / SUM(GP19 + GP15 + GP24)^* 100$                                             |
| IGP32 | $FBG2S2/(FBG2+FBG2S1+FBG2S2)$ |  | <i>The percentage of disialylation of fucosylated digalactosylated structures with bisecting GlcNAc in total IgG glycans</i>   | $GP24 / SUM(GP24 + GP15 + GP19)^* 100$                                             |
| IGP33 | $F^{total}S1/F^{total}S2$     |  | <i>Ratio of all fucosylated (+/- bisecting GlyNAc) monosialylated and disialylated structures in total IgG glycans</i>         | $SUM(GP16 + GP18 + GP19) / SUM(GP23 + GP24)$                                       |
| IGP34 | $FS1/FS2$                     |  | <i>Ratio of fucosylated (without bisecting GlcNAc) monosialylated and disialylated structures in total IgG glycans</i>         | $SUM(GP16 + GP18) / GP23$                                                          |
| IGP35 | $FBS1/FBS2$                   |  | <i>Ratio of fucosylated (with bisecting GlcNAc) monosialylated and disialylated structures in total IgG glycans</i>            | $GP19 / GP24$                                                                      |
| IGP36 | $FBS^{total}/FS^{total}$      |  | <i>Ratio of all fucosylated sialylated structures</i>                                                                          | $SUM(GP19 + GP24) /$                                                               |

|                            |       |                   |  |                                                                                                            |                                       |
|----------------------------|-------|-------------------|--|------------------------------------------------------------------------------------------------------------|---------------------------------------|
|                            |       |                   |  | <i>with and without bisecting GlcNAc</i>                                                                   | <i>SUM(GP16 + GP18 + GP23)</i>        |
|                            | IGP37 | FBS1/FS1          |  | <i>Ratio of fucosylated monosialylated structures with and without bisecting GlcNAc</i>                    | <i>GP19 / SUM(GP16 + GP18)</i>        |
|                            | IGP38 | FBS1/(FS1+FBS1)   |  | <i>The incidence of bisecting GlcNAc in all fucosylated monosialylated structures in total IgG glycans</i> | <i>GP19 / SUM(GP16 + GP18 + GP19)</i> |
|                            | IGP39 | FBS2/FS2          |  | <i>Ratio of fucosylated disialylated structures with and without bisecting GlcNAc</i>                      | <i>GP24 / GP23</i>                    |
|                            | IGP40 | FBS2/(FS2+FBS2)   |  | <i>The incidence of bisecting GlcNAc in all fucosylated disialylated structures in total IgG glycans</i>   | <i>GP24 / SUM(GP23 + GP24)</i>        |
| <i>Neutral IgG glycans</i> | IGP41 | GP1 <sup>n</sup>  |  | <i>The percentage of FA1 glycan in total neutral IgG glycans (GP<sup>n</sup>)</i>                          | <i>GP1 / GP<sup>n</sup>* 100</i>      |
|                            | IGP42 | GP2 <sup>n</sup>  |  | <i>The percentage of A2 glycan in total neutral IgG glycans (GP<sup>n</sup>)</i>                           | <i>GP2 / GP<sup>n</sup>* 100</i>      |
|                            | IGP43 | GP4 <sup>n</sup>  |  | <i>The percentage of FA2 glycan in total neutral IgG glycans (GP<sup>n</sup>)</i>                          | <i>GP4 / GP<sup>n</sup>* 100</i>      |
|                            | IGP44 | GP5 <sup>n</sup>  |  | <i>The percentage of M5 glycan in total neutral IgG glycans (GP<sup>n</sup>)</i>                           | <i>GP5 / GP<sup>n</sup>* 100</i>      |
|                            | IGP45 | GP6 <sup>n</sup>  |  | <i>The percentage of FA2B glycan in total neutral IgG glycans (GP<sup>n</sup>)</i>                         | <i>GP6 / GP<sup>n</sup>* 100</i>      |
|                            | IGP46 | GP7 <sup>n</sup>  |  | <i>The percentage of A2G1 glycan in total neutral IgG glycans (GP<sup>n</sup>)</i>                         | <i>GP7 / GP<sup>n</sup>* 100</i>      |
|                            | IGP47 | GP8 <sup>n</sup>  |  | <i>The percentage of FA2[6]G1 glycan in total neutral IgG glycans (GP<sup>n</sup>)</i>                     | <i>GP8 / GP<sup>n</sup>* 100</i>      |
|                            | IGP48 | GP9 <sup>n</sup>  |  | <i>The percentage of FA2[3]G1 glycan in total neutral IgG glycans (GP<sup>n</sup>)</i>                     | <i>GP9 / GP<sup>n</sup>* 100</i>      |
|                            | IGP49 | GP10 <sup>n</sup> |  | <i>The percentage of FA2[6]BG1 glycan in total neutral IgG glycans (GP<sup>n</sup>)</i>                    | <i>GP10 / GP<sup>n</sup>* 100</i>     |
|                            | IGP50 | GP11 <sup>n</sup> |  | <i>The percentage of FA2[3]BG1 glycan in total neutral IgG glycans (GP<sup>n</sup>)</i>                    | <i>GP11 / GP<sup>n</sup>* 100</i>     |
|                            | IGP51 | GP12 <sup>n</sup> |  | <i>The percentage of A2G2 glycan in total neutral IgG glycans (GP<sup>n</sup>)</i>                         | <i>GP12 / GP<sup>n</sup>* 100</i>     |
|                            | IGP52 | GP13 <sup>n</sup> |  | <i>The percentage of A2BG2 glycan in total</i>                                                             | <i>GP13 / GP<sup>n</sup>* 100</i>     |

|                                                 |       |                                         |  |                                                                                                         |                                                                                 |
|-------------------------------------------------|-------|-----------------------------------------|--|---------------------------------------------------------------------------------------------------------|---------------------------------------------------------------------------------|
|                                                 |       |                                         |  | <i>neutral IgG glycans (GP<sup>n</sup>)</i>                                                             |                                                                                 |
|                                                 | IGP53 | GP14 <sup>n</sup>                       |  | <i>The percentage of FA2G2 glycan in total neutral IgG glycans (GP<sup>n</sup>)</i>                     | $GP14 / GP^n * 100$                                                             |
|                                                 | IGP54 | GP15 <sup>n</sup>                       |  | <i>The percentage of FA2BG2 glycan in total neutral IgG glycans (GP<sup>n</sup>)</i>                    | $GP15 / GP^n * 100$                                                             |
| <i>Neutral IgG glycans - derived parameters</i> | IGP55 | G0 <sup>n</sup>                         |  | <i>The percentage of agalactosylated structures in total neutral IgG glycans</i>                        | $SUM(GP1^n: GP6^n)$                                                             |
|                                                 | IGP56 | G1 <sup>n</sup>                         |  | <i>The percentage of monogalactosylated structures in total neutral IgG glycans</i>                     | $SUM(GP7^n: GP11^n)$                                                            |
|                                                 | IGP57 | G2 <sup>n</sup>                         |  | <i>The percentage of digalactosylated structures in total neutral IgG glycans</i>                       | $SUM(GP12^n: GP15^n)$                                                           |
|                                                 | IGP58 | F <sup>n total</sup>                    |  | <i>The percentage of all fucosylated (+/- bisecting GlcNAc) structures in total neutral IgG glycans</i> | $SUM(GP1^n+ GP4^n+ GP5^n+ GP6^n+ GP8^n+ GP9^n+ GP10^n+ GP11^n+ GP14^n+ GP15^n)$ |
|                                                 | IGP59 | FG0 <sup>n total</sup> /G0 <sup>n</sup> |  | <i>The percentage of fucosylation of agalactosylated structures</i>                                     | $SUM(GP1^n+ GP4^n+ GP5^n+ GP6^n) / G0^n * 100$                                  |
|                                                 | IGP60 | FG1 <sup>n total</sup> /G1 <sup>n</sup> |  | <i>The percentage of fucosylation of monogalactosylated structures</i>                                  | $SUM(GP8^n+ GP9^n+ GP10^n+ GP11^n) / G1^n * 100$                                |
|                                                 | IGP61 | FG2 <sup>n total</sup> /G2 <sup>n</sup> |  | <i>The percentage of fucosylation of digalactosylated structures</i>                                    | $SUM(GP14^n+ GP15^n) / G2^n * 100$                                              |
|                                                 | IGP62 | F <sup>n</sup>                          |  | <i>The percentage of fucosylated (without bisecting GlcNAc) structures in total neutral IgG glycans</i> | $SUM(GP1^n+ GP4^n+ GP5^n+ GP8^n+ GP9^n+ GP14^n)$                                |
|                                                 | IGP63 | FG0 <sup>n</sup> /G0 <sup>n</sup>       |  | <i>The percentage of fucosylation (without bisecting GlcNAc) of agalactosylated structures</i>          | $SUM(GP1^n+ GP4^n+ GP5^n) / G0^n * 100$                                         |
|                                                 | IGP64 | FG1 <sup>n</sup> /G1 <sup>n</sup>       |  | <i>The percentage of fucosylation (without bisecting GlcNAc) of monogalactosylated structures</i>       | $SUM(GP8^n+ GP9^n) / G1^n * 100$                                                |
|                                                 | IGP65 | FG2 <sup>n</sup> /G2 <sup>n</sup>       |  | <i>The percentage of fucosylation (without bisecting GlcNAc) of digalactosylated structures</i>         | $GP14^n / G2^n * 100$                                                           |
|                                                 | IGP66 | FB <sup>n</sup>                         |  | <i>The percentage of fucosylated (with bisecting GlcNAc) structures in total neutral IgG glycans</i>    | $SUM(GP6^n+ GP10^n+ GP11^n+ GP15^n)$                                            |

|       |                           |  |                                                                                                                                          |                                     |
|-------|---------------------------|--|------------------------------------------------------------------------------------------------------------------------------------------|-------------------------------------|
| IGP67 | $FBG0^n/G0^n$             |  | <i>The percentage of fucosylation (with bisecting GlcNAc) of agalactosylated structures</i>                                              | $GP6^n / G0^n * 100$                |
| IGP68 | $FBG1^n/G1^n$             |  | <i>The percentage of fucosylation (with bisecting GlcNAc) of monogalactosylated structures</i>                                           | $SUM(GP10^n + GP11^n) / G1^n * 100$ |
| IGP69 | $FBG2^n/G2^n$             |  | <i>The percentage of fucosylation (with bisecting GlcNAc) of digalactosylated structures</i>                                             | $GP15^n / G2^n * 100$               |
| IGP70 | $FB^n/F^n$                |  | <i>Ratio of fucosylated structures with and without bisecting GlcNAc</i>                                                                 | $FB^n / F^n * 100$                  |
| IGP71 | $FB^n/F^n \text{ total}$  |  | <i>The incidence of bisecting GlcNAc in all fucosylated structures in total neutral IgG glycans</i>                                      | $FB^n / F^n \text{ total} * 100$    |
| IGP72 | $F^n/(B^n + FB^n)$        |  | <i>Ratio of fucosylated non-bisecting GlcNAc structures and all structures with bisecting GlcNAc</i>                                     | $F^n/(GP13^n + FB^n)$               |
| IGP73 | $B^n/(F^n + FB^n)$        |  | <i>Ratio of structures with bisecting GlcNAc and all fucosylated structures (+/- bisecting GlcNAc)</i>                                   | $GP13^n / (F^n + FB^n) * 1000$      |
| IGP74 | $FBG2^n/FG2^n$            |  | <i>Ratio of fucosylated digalactosylated structures with and without bisecting GlcNAc</i>                                                | $GP15^n/GP14^n$                     |
| IGP75 | $FBG2^n/(FG2^n + FBG2^n)$ |  | <i>The incidence of bisecting GlcNAc in all fucosylated digalactosylated structures in total neutral IgG glycans</i>                     | $GP15^n/(GP14^n + GP15^n) * 100$    |
| IGP76 | $FG2^n/(BG2^n + FBG2^n)$  |  | <i>Ratio of fucosylated digalactosylated non-bisecting GlcNAc structures and all digalactosylated structures with bisecting GlcNAc</i>   | $GP14^n/(GP13^n + GP15^n)$          |
| IGP77 | $BG2^n/(FG2^n + FBG2^n)$  |  | <i>Ratio of digalactosylated structures with bisecting GlcNAc and all fucosylated digalactosylated structures (+/- bisecting GlcNAc)</i> | $GP15^n/(GP14^n + GP15^n) * 1000$   |

<sup>a</sup>Symbol nomenclature for glycan representation was used according to: Varki A, Cummings RD, Esko JD, et al. Symbol nomenclature for glycan representation. Proteomics. 2009;9(24):5398-5399. doi:10.1002/pmic.200900708.



**Supplementary Table 2. Correlations between glycan levels and summary scores for lumbar magnetic resonance imaging signs**

| <b>Glycan</b> | <b>Correlation coefficient*</b> | <b>p-value</b> |
|---------------|---------------------------------|----------------|
| GP1           | -0.008                          | 0.835          |
| GP2           | 0.085                           | 0.032          |
| GP4           | -0.001                          | 0.974          |
| GP5           | 0.063                           | 0.115          |
| GP6           | 0.024                           | 0.549          |
| GP7           | 0.066                           | 0.096          |
| GP8           | -0.014                          | 0.725          |
| GP9           | -0.045                          | 0.255          |
| GP10          | 0.005                           | 0.907          |
| GP11          | 0.011                           | 0.781          |
| GP12          | 0.022                           | 0.574          |
| GP13          | -0.011                          | 0.781          |
| GP14          | -0.083                          | 0.037          |
| GP15          | -0.044                          | 0.265          |
| GP16          | -0.016                          | 0.681          |
| GP17          | 0.041                           | 0.306          |
| GP18          | -0.064                          | 0.109          |
| GP19          | -0.043                          | 0.281          |
| GP2021        | 0.045                           | 0.258          |
| GP22          | -0.011                          | 0.783          |
| GP23          | -0.050                          | 0.211          |
| GP24          | -0.053                          | 0.183          |
| IGP24         | -0.021                          | 0.606          |
| IGP25         | -0.031                          | 0.433          |
| IGP26         | -0.029                          | 0.462          |
| IGP27         | -0.043                          | 0.281          |
| IGP28         | 0.012                           | 0.755          |
| IGP29         | 0.045                           | 0.260          |
| IGP30         | 0.014                           | 0.720          |
| IGP31         | 0.003                           | 0.938          |
| IGP32         | -0.017                          | 0.670          |
| IGP33         | 0.002                           | 0.962          |
| IGP34         | 0.004                           | 0.917          |
| IGP35         | 0.009                           | 0.831          |
| IGP36         | 0.009                           | 0.819          |
| IGP37         | 0.008                           | 0.846          |
| IGP38         | 0.008                           | 0.847          |
| IGP39         | 0.019                           | 0.634          |
| IGP40         | 0.019                           | 0.634          |
| IGP41         | 0.001                           | 0.976          |
| IGP42         | 0.095                           | 0.017          |

|       |        |       |
|-------|--------|-------|
| IGP43 | 0.020  | 0.623 |
| IGP44 | 0.082  | 0.040 |
| IGP45 | 0.035  | 0.381 |
| IGP46 | 0.069  | 0.082 |
| IGP47 | 0.007  | 0.864 |
| IGP48 | -0.035 | 0.378 |
| IGP49 | 0.023  | 0.569 |
| IGP50 | 0.030  | 0.459 |
| IGP51 | 0.027  | 0.491 |
| IGP52 | 0.004  | 0.917 |
| IGP53 | -0.063 | 0.115 |
| IGP54 | -0.021 | 0.607 |
| IGP55 | 0.031  | 0.442 |
| IGP56 | 0.014  | 0.718 |
| IGP57 | -0.053 | 0.183 |
| IGP58 | -0.061 | 0.126 |
| IGP59 | -0.086 | 0.030 |
| IGP60 | -0.067 | 0.091 |
| IGP61 | -0.070 | 0.081 |
| IGP62 | -0.050 | 0.211 |
| IGP63 | -0.043 | 0.285 |
| IGP64 | -0.035 | 0.383 |
| IGP65 | -0.081 | 0.042 |
| IGP66 | 0.033  | 0.406 |
| IGP67 | 0.023  | 0.560 |
| IGP68 | 0.021  | 0.594 |
| IGP69 | 0.056  | 0.162 |
| IGP70 | 0.038  | 0.341 |
| IGP71 | 0.038  | 0.341 |
| IGP72 | -0.038 | 0.342 |
| IGP73 | 0.007  | 0.851 |
| IGP74 | 0.064  | 0.111 |
| IGP75 | 0.064  | 0.111 |
| IGP76 | -0.068 | 0.087 |
| IGP77 | 0.072  | 0.072 |

\* Pearson's correlations were estimated after adjusting glycan levels for age, sex, BMI, and inflammatory disease status.

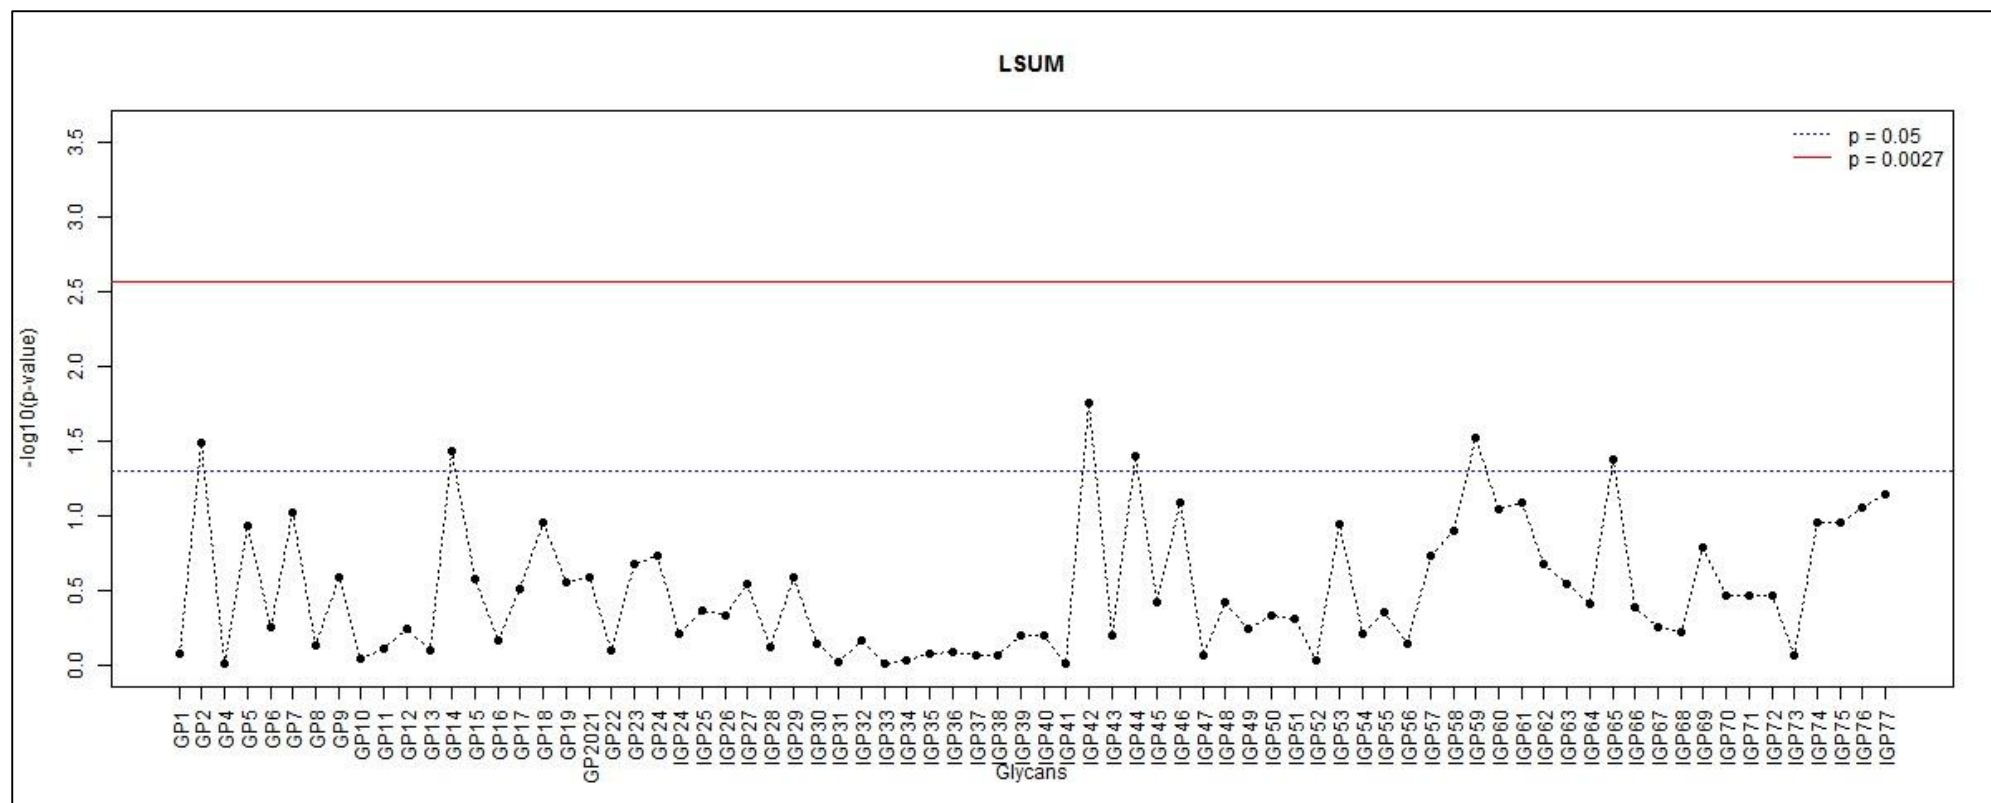

**Supplementary Figure 1. P-values (-log<sub>10</sub>) for the analysis of correlations between glycan levels and LSUM MRI scores.**

P-values correspond to Pearson's correlation coefficients provided in Supplementary table 2.
